# Supplementary material
Source: PubMed Central journal article supplement (PMC3416628)
Supplement: AEM.01304-12_zam999103569so1.pdf [file AEM.01304-12_zam999103569so1.pdf]

1 **Title:**

2 The TetR-type transcriptional repressor RolR from *Corynebacterium glutamicum*  
3 regulates resorcinol catabolism by binding to a unique operator *rolO*

4 **Running title:**

5 RolR binds to *rolO* and regulates resorcinol catabolism

6 **Authors' affiliations:**

7 Tang Li<sup>1,2</sup>, Kexin Zhao<sup>1†</sup>, Yan Huang<sup>1‡</sup>, Defeng Li<sup>3</sup>, Cheng-Ying Jiang<sup>1,2</sup>, Nan Zhou<sup>1,2</sup>,  
8 Zheng Fan<sup>4</sup>, Shuang-Jiang Liu<sup>1,2\*</sup>

9 <sup>1</sup>State Key Laboratory of Microbial Resources and <sup>2</sup>Environmental Microbiology  
10 Research Center at Institute of Microbiology, Beijing, 100101, P. R. China; <sup>3</sup>National  
11 Laboratory of Biomacromolecules, Institute of Biophysics, Chinese Academy of  
12 Sciences, Beijing 100101, China; <sup>4</sup>Core Facility at Institute of Microbiology, Beijing,  
13 100101, P. R. China

14 †Present address: Suite 2200, Cardiovascular Research Center, 290, Munro St,  
15 Thunder Bay, Ontario, Canada.

16 ‡Present address: State Key Laboratory of Chemo/biosensing and chemometrics,  
17 Hunan University, Changsha, China.

18 **Corresponding author\*:**

19 Shuang-Jiang Liu

20 Institute of Microbiology, Chinese Academy of Sciences

21 Beichen Xilu 1, Chaoyang District

22 Beijing 100101, P. R. China

23 Tel: +86-10-64807423; Fax: +86-10-64807421

24 Email: [liusj@im.ac.cn](mailto:liusj@im.ac.cn)

25

26 **Appendixes:**

27 **Table A1.** Primers and dsDNA used in this study. Restriction enzyme cutting sites  
 28 are underlined. Ribosome binding site is given in boldface.

| <b>Primers (5'-3')</b> |                                                                |                                                                      |
|------------------------|----------------------------------------------------------------|----------------------------------------------------------------------|
| Q11F                   | GCACCCGATACTGGTTCTA                                            | For real-time qRT-PCR analysis of <i>rolH</i>                        |
| Q11R                   | AGTGACAATGCCGTGAATG                                            |                                                                      |
| Q12F                   | TATGGCTGCTGAGGGAATT                                            | For real-time qRT-PCR analysis of <i>rolM</i>                        |
| Q12R                   | CAGGTAGGCACCGTAGAGC                                            |                                                                      |
| Q13F                   | AAAACCCTCGCCTCAAAC                                             | For real-time qRT-PCR analysis of <i>rolD</i>                        |
| Q13R                   | GTCGGTGATATGCCCAACC                                            |                                                                      |
| QrpoBF                 | CGTACTGCTGAAGGCTCTT                                            | For real-time qRT-PCR analysis of <i>rpoB</i> as an internal control |
| QrpoBR                 | TTTGCTACACCATCGGACT                                            |                                                                      |
| 11a                    | GAAGCAGGGCATAGTGGA                                             | To amplify <i>rolHM</i> transcript with 12b                          |
| 12b                    | CTAATTTTCAGCGGCGAGA                                            |                                                                      |
| 12c                    | CAGCGACTATCCGATTACG                                            | To amplify <i>rolMD</i> transcript with 13d                          |
| 13d                    | TCTTTGACCGTTCCCTCC                                             |                                                                      |
| 1110F                  | ACACATATGCCACGCCTTCG ( <i>NdeI</i> )                           | To generate pET28a- <i>rolR</i>                                      |
| 1110R                  | CTTGAGCTCCCTGAGTCTGGTGCTT ( <i>SacI</i> )                      |                                                                      |
| PE10                   | TGAAGCGTCCTTGTGCTG                                             | For primer extension of <i>rolR</i>                                  |
| PE11                   | ACCTCCACCGACGATGCAG                                            | For primer extension of <i>rolHMD</i>                                |
| FP11F                  | CGAAGGCGTGGGCATAGGG                                            | For DNase I footprinting of the <i>rolHMD</i> sense strand           |
| FP11R                  | TTCGTAGAATGTTGGCCAC                                            |                                                                      |
| P10F                   | <u>GGCGCC</u> CAGACATCGGTATCGAAG ( <i>NarI</i> )               | To generate pXMJ19-P <sub><i>rolR</i></sub> - <i>lacZ</i>            |
| P10R                   | <u>CTGCAG</u> CATAGGGAAAACCTTAGC ( <i>PstI</i> )               |                                                                      |
| TRC10F                 | TAAGAATTC <b>AAAGGAGGA</b> ATGCCAC GCCTTCGAGC ( <i>EcoRI</i> ) | To generate pTRCmob- <i>rolR</i>                                     |
| TRC10R                 | GGCGGATCCCTACTGCGGTTTACTGG ( <i>BamHI</i> )                    |                                                                      |
| <b>For EMSA</b>        |                                                                |                                                                      |
| EMSAF1                 | TAGCTGATCTGCGGTG                                               | To generate the M/F1 fragment                                        |

|                     |                                                                 |                                         |
|---------------------|-----------------------------------------------------------------|-----------------------------------------|
| EMSAR1              | CGAAGTTATTGGGTGA                                                | with EMSAR1                             |
| EMSAF2              | TGAAAATCTGAACCCTTGTTTCAT                                        | To generate the F2 fragment with EMSAR2 |
| EMSAR2              | CTGAACAACATTATCTAGATCACA                                        |                                         |
| EMSAF3              | ATTTATGAATCATGATTCAGAATG                                        | To generate the F3 fragment with EMSAR2 |
| EMSAR3              | CATTCTGAATCATGATTCATAAAT                                        | To generate the F4 fragment with EMSAF1 |
| EMSAF4              | AATGGGGGTATTGTAAA                                               | To generate the F5 fragment with EMSAR3 |
| EMSAR4              | TGATTCATAAATGAACA                                               | To generate the F6 fragment with EMSAF4 |
| EMSAF5              | AATGGGGGTATTGTAAAATCTGAACCC<br>TTGTTCAATTTATG                   | To generate the F7 fragment with EMSAR5 |
| EMSAR5              | CATAAATGAACAAGGGTTCAGATTTTA<br>CAATACCCCAT                      |                                         |
| EMSAF6              | ACCCTTGTTTCATTTATGAA                                            | To generate the F8 fragment with EMSAR6 |
| EMSAR6              | TTCATAAATGAACAAGGGT                                             |                                         |
| EMSAFU              | AGGTTCCCGTTCCGATGTTT                                            | To generate the U fragment with EMSARU  |
| EMSARU              | CTAAGGTTTTCCCTATGCCC                                            |                                         |
| EMSAFD              | GATCCCATGTCACCCAATA                                             | To generate the D fragment with EMSARD  |
| EMSARD              | CCAATCGACTTCCAAAAGC                                             |                                         |
| <b>dsDNA in SPR</b> |                                                                 |                                         |
| REP1                | TGAACCCTTGTTCA<br>ACTTGGGAACAAGT                                | The 1 <sup>st</sup> inverted repeat     |
| REP2                | TTCATTTATGAA<br>AAGTAAATACTT                                    | The 2 <sup>nd</sup> inverted repeat     |
| REP3                | TGAATCATGATTCA<br>ACTTAGTACTAAGT                                | The 3 <sup>rd</sup> inverted repeat     |
| <i>rolO</i>         | AAAATCTGAACCCTTGTTTCATTTATGAAT<br>TTTTAGACTTGGGAACAAGTAAATACTTA | The operator <i>rolO</i>                |

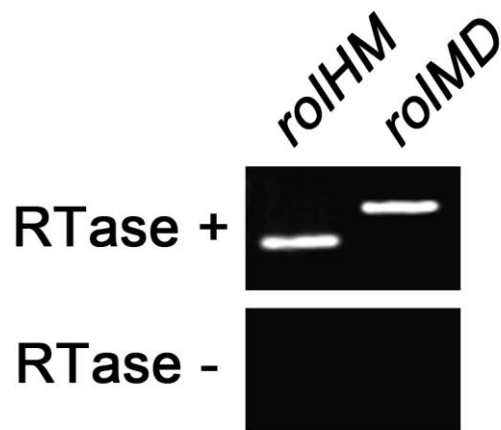

29

30 **Figure A1.** RT-PCR analysis of the co-transcription of genes *rolH*, *rolM*, and *rolD*.  
 31 RTase+ indicates addition of reverse transcriptase and RTase- indicates no addition  
 32 of reverse transcriptase. The primers inside the coding region of genes were used to  
 33 amplify the fragments spanning the intergenic regions of *rolH* and *rolM* (lane,  
 34 *rolHM*), *rolM* and *rolD* (lane, *rolMD*).

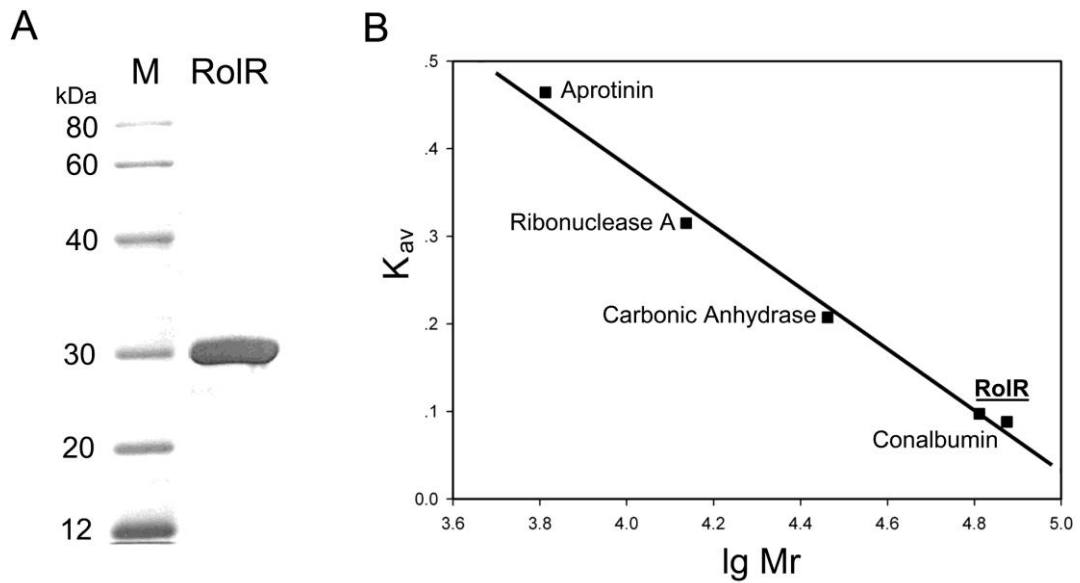

35

36 **Figure A2.** Purification of His<sub>6</sub>-RolR and determination of its native molecular mass.

37 **A:** Coomassie-stained SDS-PAGE of His<sub>6</sub>-RolR purified by Ni<sup>2+</sup>-NTA

38 chromatography and FPLC. **B:** Determination of the native molecular mass by gel

39 filtration. For calibration, a premixed protein molecular mass marker containing the

40 following proteins was used: Aprotinin (6,500 Da), Ribonuclease A (13,700 Da),

41 Carbonic anhydrase (29,000 Da), Conalbumin (75,000 Da). V<sub>o</sub> was determined with

42 blue dextran (2,000 kDa).

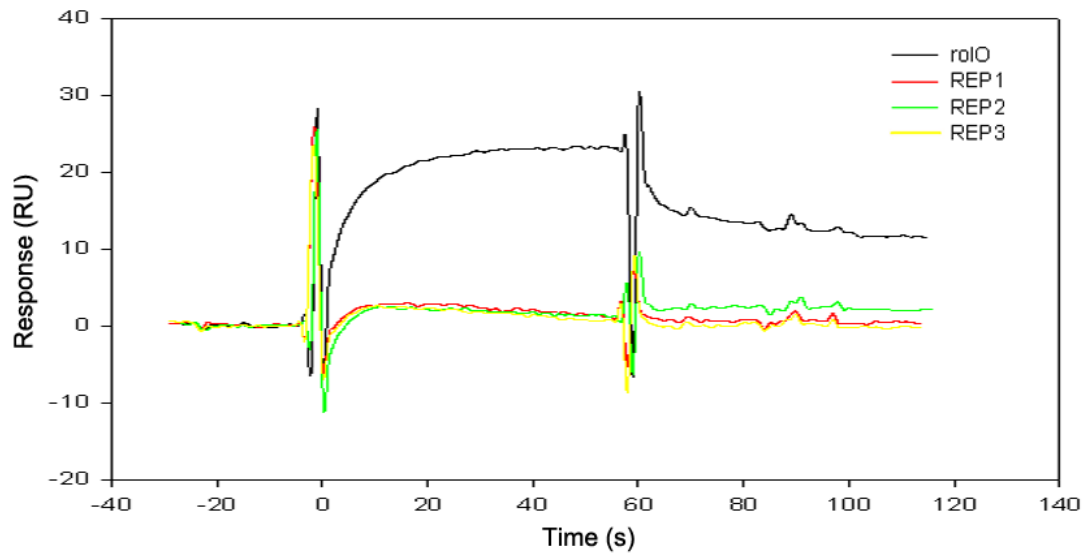

43

44 **Figure A3.** Surface Plasmon Resonance assay of RolR binding to different dsDNA  
45 fragments. His<sub>6</sub>-RolR was immobilized on a CM5 sensor chip and the individual  
46 dsDNA fragment (50  $\mu$ M, 20  $\mu$ l) was injected at a flow rate of 20  $\mu$ l/min.

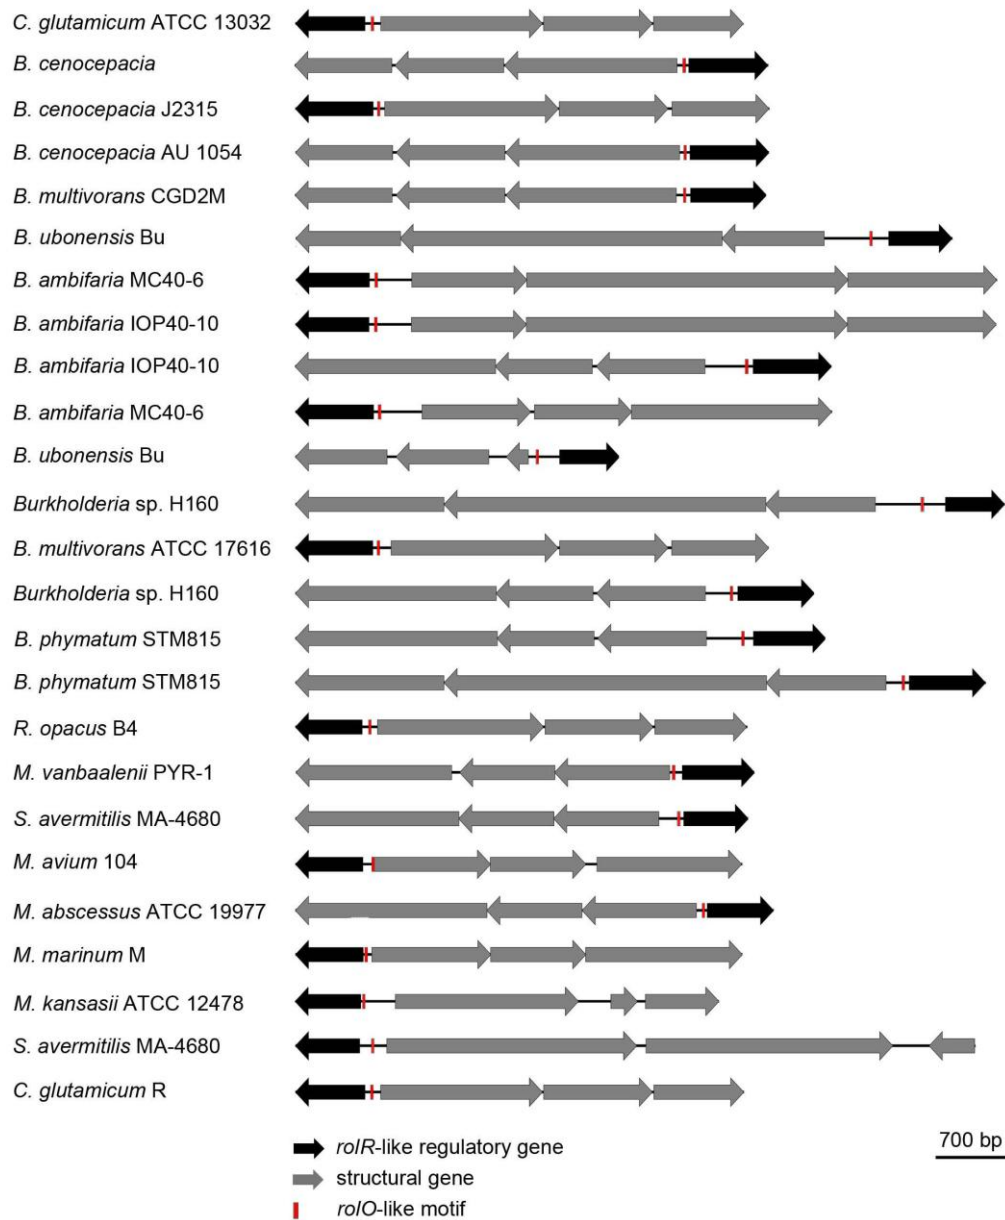

47

48 **Figure A4.** Genome data-mining of *rolR*-like genes and *rolO*-like motifs (red tangles)

49 from species of *Corynebacterium*, *Burkholderia*, *Mycobacterium*, *Rhodococcus*, and

50 *Streptomyces*. The lengths and distances of gene coding regions are drawn to scale

51 based on genome annotation.
